# Supplementary material for: A flexible mesoporous Cu doped FeSn–G–SiO2composite based biosensor for microalbumin detection
Source: Royal Society of Chemistry journal article supplement (doi:10.1039/d2ra04932e), 2022-01-01
Supplement: d2ra04932e1.pdf [file d2ra04932e1.pdf]

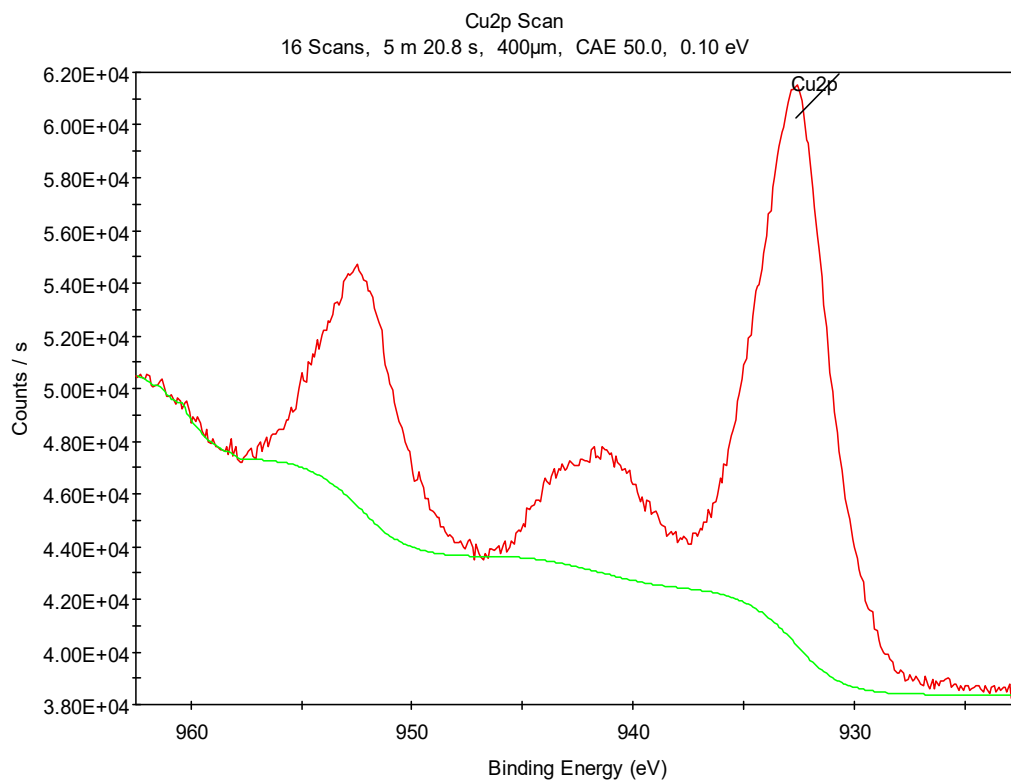

(a)

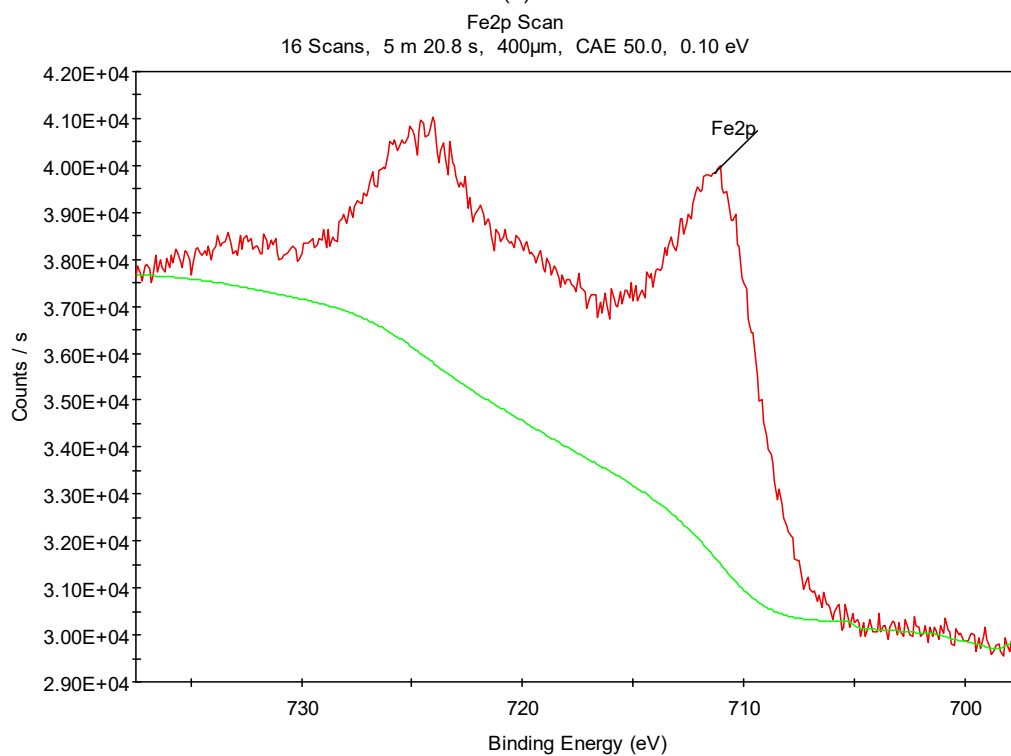

(b)

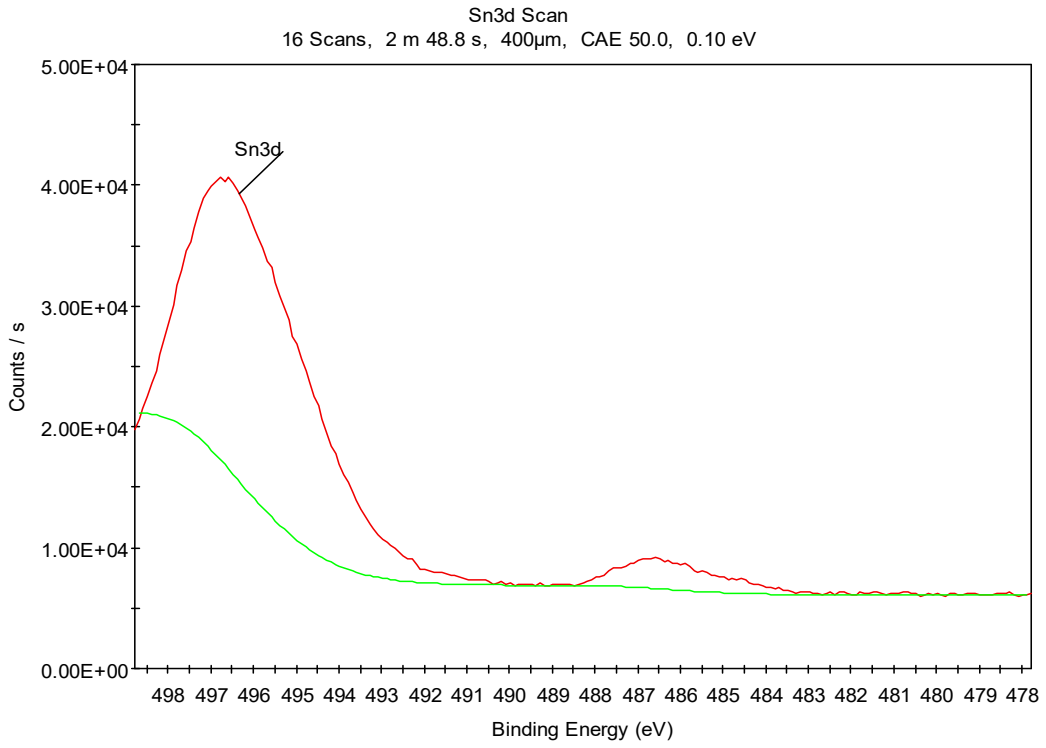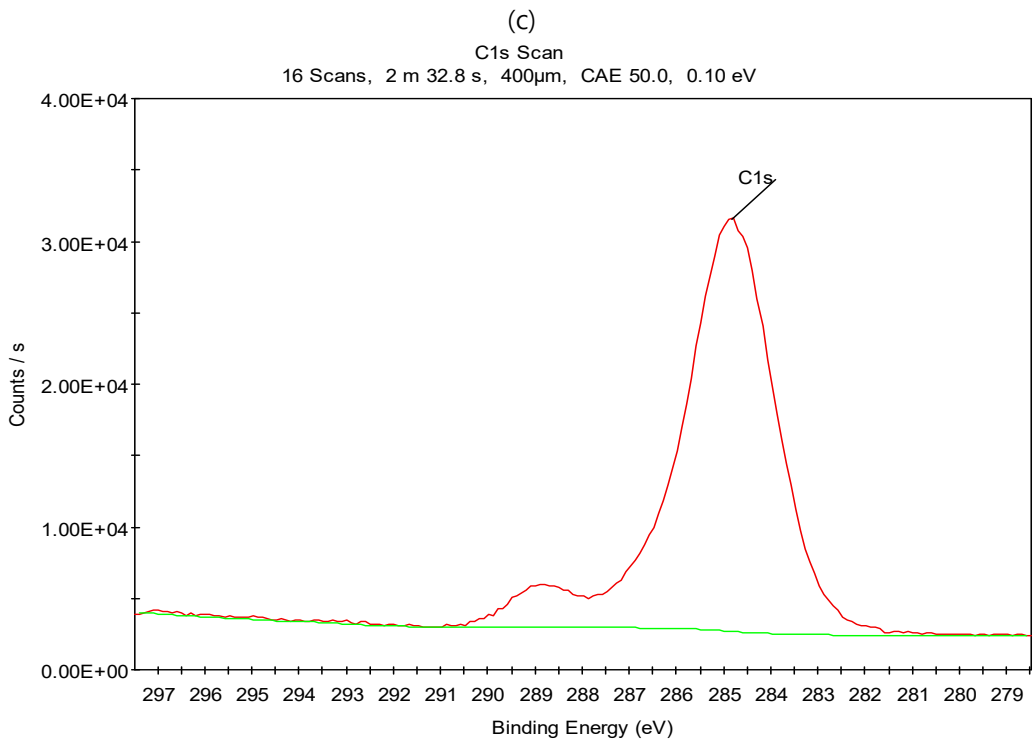

(d)

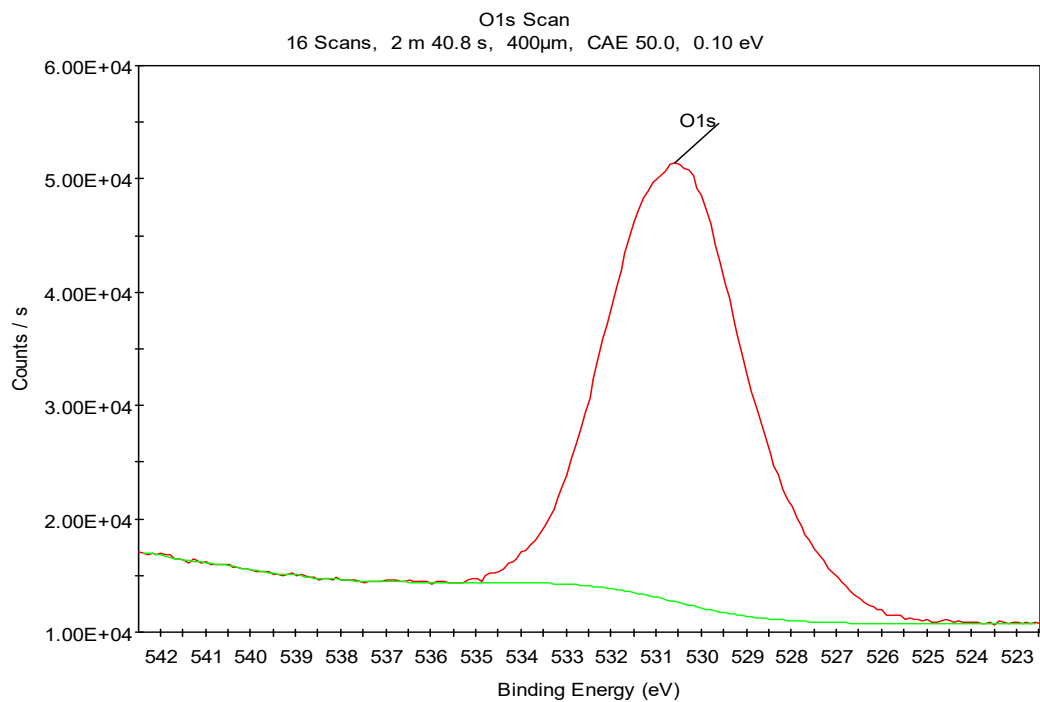

(e)

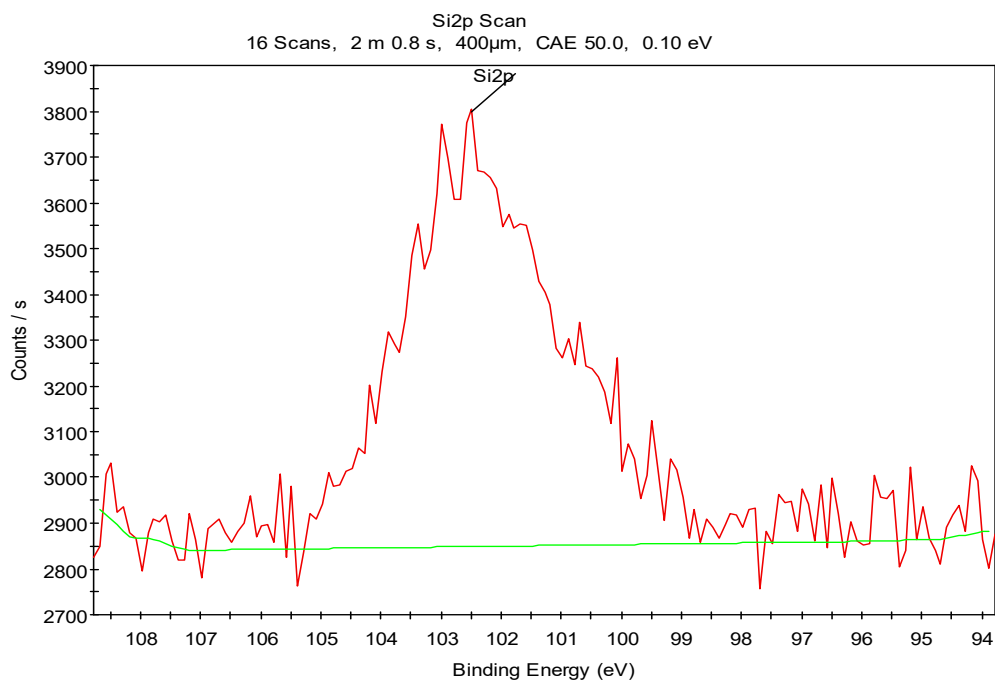

(f)

**Fig. S1. (a) XPS spectra of Cu2p, (b) Fe2p, (c) Sn3d, (d) C1s, (e) O1s, and (f) Si2p.**

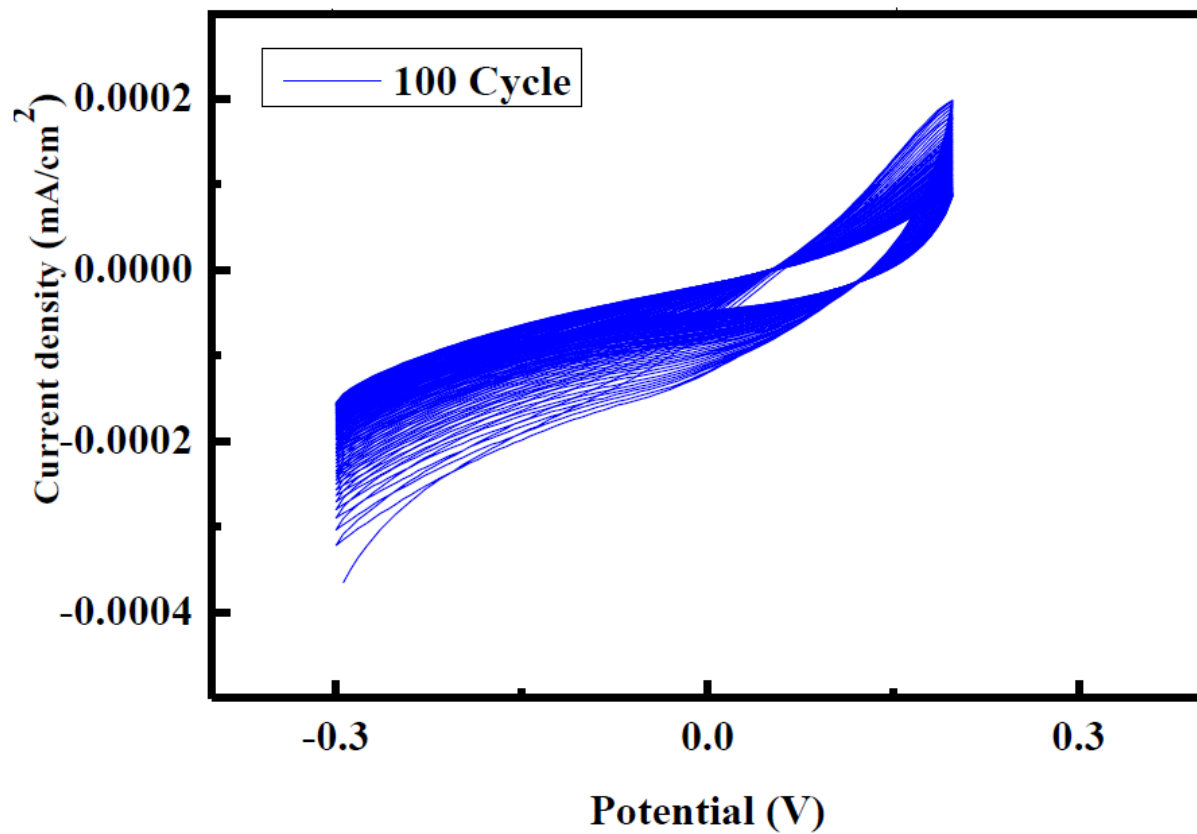

**Fig. S2.** Cyclic voltammogram of CFSGS electrode in PBS in the absence of microalbumin with 50  $\mu\text{L}$  microalbumin in PBS at scan rate of  $100 \text{ mV s}^{-1}$  ( $\text{pH} = 7.0$ ).

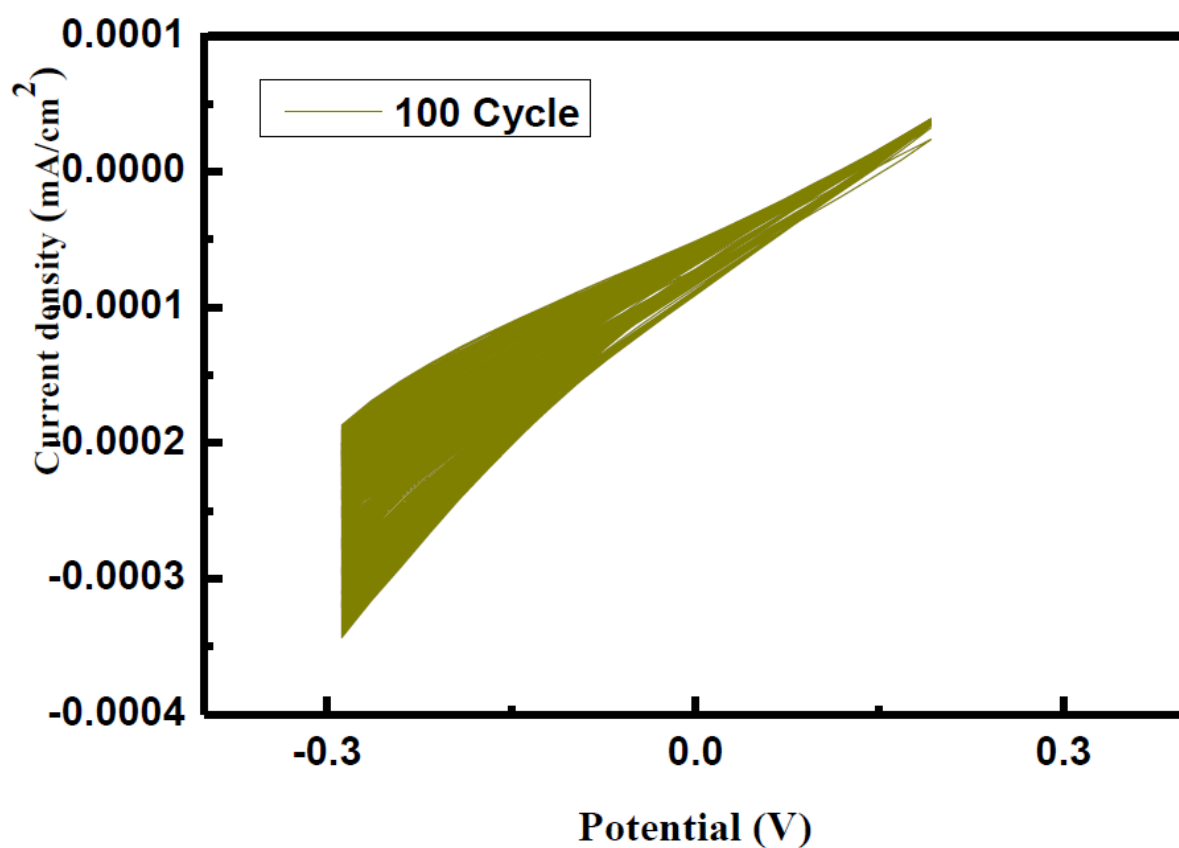

Fig. S3. Cyclic voltammogram of CFSGS electrode in PBS in the absence of microalbumin with 100  $\mu\text{L}$  microalbumin in PBS at scan rate of  $100 \text{ mV s}^{-1}$  ( $\text{pH} = 7.0$ ).
